# Supplementary material for: A case study of the large-scale traveling ionospheric disturbances in the East Asian sector during the 2015 St. Patrick’s Day geomagnetic storm
Source: Copernicus journal article supplement (doi:10.5194/angeo-2019-63), 2019-04-29
Supplement: Supplementary file [file angeo-2019-63-AC2-supplement.zip]

# A case study of the large-scale traveling ionospheric disturbances in the East Asian sector during the 2015 St. Patrick's Day geomagnetic storm

Jing Liu<sup>1</sup>, Dong-He Zhang<sup>1\*</sup>, Anthea J. Coster<sup>2</sup>, Shun-Rong Zhang<sup>2</sup>, Guan-Yi Ma<sup>3</sup>, Yong-Qiang Hao<sup>1</sup>, Zuo Xiao<sup>1</sup>.

1, Department of Geophysics, Peking University, Beijing, China, 100871

2, MIT Haystack Observatory, Westford, Massachusetts, USA

3, National Astronomical Observatories, Chinese Academy of Sciences, Beijing, China

## Abstract

This study presents a comprehensive observation of the large-scale traveling ionospheric disturbances (LSTIDs) in the East Asian sector during the 2015 St. Patrick's Day (March 17, 2015) geomagnetic storm. For the first time, 3 dense networks of GPS receivers in China and Japan are combined together to obtain the 2-dimensional (2D) vertical total electron content (VTEC) perturbation maps in a wider longitudinal range than previous works in this region. Results show that a trough of LSTID spanning at least 60° in longitude (80°E-140°E) occurs and propagates from high to lower latitudes around 09:40-11:20 UT. It is followed by a crest of LSTID which shows a tendency of dissipation starting from the East side. The manifestation of the 2D VTEC perturbation maps is in good agreement with the recordings from 2 high-frequency Doppler shift stations and the iso-frequency lines from 8 ionosondes. Then, the propagation parameters of the LSTIDs are estimated by applying least square fitting methods to the distinct structures in the 2D VTEC perturbation plots. In general, the propagation parameters are observably longitudinal dependent. For example, the propagation direction is almost due southward between 105°E-115°E, while it is slightly South by West/East in the West/East side of this region. This feature is probably related to the regional geomagnetic declination. The mean values of the period, trough velocity ( $V_t$ ), crest velocity ( $V_c$ ), and wavelength of the wavelike LSTIDs in the studied longitudinal bands are  $74.8 \pm 1.4$  minutes,  $578 \pm 16$  m/s,  $617 \pm 23$  m/s, and  $2691 \pm 80$  km, respectively. Finally, using the VTEC map data from the Madrigal database of the MIT Haystack Observatory, the characteristics of the ionospheric disturbances over the European sector (30°N-70°N, 10°E-20°E) are also studied. The results are very different from those in the East Asian sector in parameters like the occurrence time, oscillation period, and propagation velocities.

**Keywords:** Geomagnetic Storm; LSTID; GPS TEC.

## 1. Introduction

During the geomagnetic storm, the solar wind energy is impulsively or continually injected into the earth polar region and making the atmospheric and ionospheric states deviate greatly from their background levels [Fuller-Rowell et al., 1994]. In general, the response of the ionosphere to the geomagnetic storm is classified by a variety of different features, one of which is the large scale traveling ionospheric disturbance (LSTID) that is the wave-like perturbation mainly propagating equatorward from high latitudes. Traveling ionospheric disturbances (TIDs) are classified into LSTIDs and Medium-scale TIDs and they are considered to be the ionospheric manifestation of the presence of atmospheric gravity waves (AGWs) stimulated by different sources. LSTIDs are mainly caused by Joule heating or Lorenz-drag forcing in the Auroral regions during geomagnetic storm period [Hines, 1960; Richmond and Roble, 1979; Hocke and Schlegel, 1996].

In earlier years, the acquisition of the continuous evolution of LSTIDs on a global scale was limited by the availability of the ionospheric observations. In order to obtain the propagation characteristics of LSTIDs on a large spatial scale, researchers needed to organize their findings from limited ionospheric observations, for example, the foF2 data from sparsely distributed ionosondes. In the 1980s, the GPS (Global Positioning System) method was introduced into the ionospheric study [Klobuchar, 1986; Lanyi and Roth, 1988; Coster and Gaposchkin, 1989]. With the dense and worldwide distributed GPS receivers, some characteristic ionospheric phenomena, like traveling ionospheric disturbances (TIDs) [Saito et al., 1998; Tsugawa et al., 2004; Ding et al., 2007], ionospheric storms [Ho et al., 1996], and ionospheric responses to solar flares [Afraimovich, 2000a; Zhang and Xiao, 2005] were revisited frequently and new results were obtained.

The propagation characteristics of LSTIDs are always topics of great research interest [Hunsucker, 1982; Ho et al., 1996; Balthazor and Moffett, 1999; Afraimovich et al., 1998, 2000; Shiokawa et al., 2002; Tsugawa et al., 2003, 2004; Ding et al., 2008, 2014; Borries et al., 2009, 2017; Habarulema et al., 2015, 2016, 2018; Zakharenkova et al., 2016; Figueiredo et al., 2017; Pederick et al., 2017; Cherniak et al., 2018; Lyons et al., 2019]. Based on limited GPS stations measurements, Afraimovich et al. [1998] propose a radio interferometry method to roughly estimate horizontal propagation velocities and phase front angles of TIDs. Further, the world-wide or local dense distribution of the GPS receivers networks facilitates the acquisition of the global or regional TEC perturbation maps with high spatial and temporal resolutions to reveal the detailed propagating characteristics of TIDs [Ho et al., 1996; Saito et al., 1998; Tsugawa et al., 2004; Borries et al., 2009; Ding et al., 2012]. With more than 60 GPS receivers distributed worldwide, Ho et al. [1996] studied the global distribution of TEC variations and perturbations during a magnetically disturbed period. They identified a TID propagating from the northern sub-auroral region to lower latitudes at a speed of about 460 m/s. The GPS Earth Observation Network (GEONET) in Japan is one of the densest GPS receiver networks on the Earth, and utilizing its data two-dimensional (2D) TEC perturbations over Japan can be mapped. With these high-resolution TEC perturbation maps, the spatial structures and temporal evolutions of a TID in the nighttime mid-latitude ionosphere over Japan were revealed clearly [Saito et al., 1998]. Since then, with this dense GPS network, the characteristics of LSTIDs over Japan are carefully studied through case and statistical analysis, and some propagation features of TIDs in this region are

revealed [Saito et al., 2001; Shiokawa et al., 2002; Tsugawa et al., 2003, 2004, 2006].

For the LSTID with scales of thousands of kilometers, the extensive spatial coverage of ionospheric observations is undoubtedly useful for capturing its propagation features. In recent years, the GPS data from densely distributed GPS stations in China are used to study LSTIDs in this region [Ding et al., 2012, 2013, 2014; Song et al., 2013]. Based on the GPS data from the Crustal Movement Observation Network of China (CMONOC), Ding et al. [2012] obtains temporal continuous 2D imaging of ionospheric disturbances during the geomagnetic storm on May 28, 2011, and find two LSTIDs moving southwestward with the front width of at least 1600 km during different storm phases. In addition, through the comparative climatological study of LSTID over North America and China, the different time dependence of LSTID occurrence over two longitudinal sectors were revealed statistically [Ding et al., 2014]. These studies further emphasize the effectiveness of the large coverage, high-resolution ionospheric observations from GPS networks on the detailed investigation of structures of the ionospheric disturbances.

The propagating direction of the LSTID during the geomagnetic storm has always been focused on for the LSTID studies. From case and statistical studies about LSTID during geomagnetic storm period over East-Asia region conducted independently by Chinese and Japanese scientists in recent years, the dominant propagating direction of LSTID in China and Japan is a little different. It mainly propagates South by West in the Chinese region [Ding et al., 2014], while it mainly propagates South by East in the Japanese region [Tsugawa et al., 2004]. Although the geomagnetic declination is considered to be one of the main factors to be responsible for the propagation direction of LSTID based on different LSTID studies, the LSTID studies concerning the same geomagnetic storm using both Chinese and Japanese GPS networks together have not yet been reported.

During the period of 17–18, March 2015, the strongest geomagnetic storm in the 24th solar cycle occurred and LSTIDs are detected and analysed in different longitudinal sectors [Ramsingh et al., 2015; Borries et al., 2016; Zakharenkova et al., 2016; Habarulema et al., 2018]. Meanwhile, two high frequency (HF) Doppler stations operated by China Meridional Project [Wang, 2010] at mid-latitude China record large ionospheric HF Doppler shifts after 10:00 UT, which seem to indicate the LSTIDs in the Asian region between 09:00-12:00 UT that reported by Habarulema et al. [2018]. In this study, the multi-network of densely distributed GPS receivers, the HF Doppler stations, and an ionosonde network are used to conduct a more comprehensive study on the propagating characteristics of the disturbances in the East Asian region, especially on the characteristics of the dominant propagating direction over China and Japan.

## 2. Data and Methods

Figure 1 illustrates the locations of ground-based receivers that are used in this study from 4 Global Navigation Satellite Systems (GNSS) networks distinguished by colors. They are Chinese Meteorological GNSS Network (CMGN), CMONOC in China, GEONET in Japan, and International GNSS Service (IGS). These receivers are selected through data quality checking and regional restriction ( $10^{\circ}\text{N} \sim 60^{\circ}\text{N}$ ,  $70^{\circ}\text{E} \sim 150^{\circ}\text{E}$ ), and the numbers of used stations are 259, 220, 1300, and 31 for CMGN, CMONOC, GEONET, and IGS, respectively. The sample rate of all GPS data is 30 seconds. Combining the carrier phase and pseudo-range measurements in two L-band frequencies of GPS receivers' observations, the vertical TEC can be obtained. In the calculation,

the height of the ionospheric thin shell is set to be 400 km, and the cutoff elevation angle is 30 degrees. The detailed process of the TEC calculation from GPS data can be found in our previous works [Zhang et al., 2009; Zhang et al., 2010].

Different methods have been used for extracting the TEC perturbations related to LSTIDs in previous works [Wan et al., 1997; Afraimovich et al., 2000; Shiokawa et al., 2002; Nicolls et al., 2004; Tsugawa et al., 2004; Ding et al., 2007]. Afraimovich et al. [2000] suggest that the LSTID characteristics in TEC can be determined by removing the trend with 3 to 5 order polynomials in order to eliminate the trends introduced by the motion of satellites and variations of the regular ionosphere. For a similar purpose, Shiokawa et al. [2002] subtract a running average of TEC over 1 hour from the raw TEC. With more than 1000 GPS receivers over Japan, a series of 2D TEC perturbation maps can be obtained. Ding et al. [2007] develop another method of obtaining the 2D TEC perturbation maps by expressing the vertical TEC as a one-order function of local time and latitude. According to their argument, this method is sufficient to remove background trends for continuous observation of a GPS receiver-satellite pair without introducing artificial perturbations. After comparing the results of these methods, a method similar to Ding et al. [2007] is conducted in this study, in which the vertical TEC at an ionospheric pierce point (IPP) is treated as a function of universal time (UT), longitude (Lon), and latitude (Lat), i.e.,

$$VTEC_0 = C_0 + C_1UT + C_2Lon + C_3Lat \quad (1)$$

$$VTECP = VTEC - VTEC_0 \quad (2)$$

in which  $VTEC_0$  is the background change and VTECP is VTEC perturbation. Then, the obtained VTECP data is reorganized into pixels which are bounded by 10°N ~ 60°N, 70°E ~ 150°E and with a spatiotemporal resolution of 1°longitude × 1°latitude × 10 minutes. The VTECP value for each pixel is set to be the average of all VTECP data of which the IPP and UT locate in this pixel. After these steps, the featured ionospheric disturbances are expected to appear on a series of 2D VTECP maps.

As a comparison, the VTEC map from Madrigal database of the MIT Haystack Observatory is used to reveal the ionospheric disturbances in the European sector (30°N ~ 70°N, 10°E ~ 20°E). This database provides worldwide VTEC values in 1°latitude × 1°longitude pixels with a temporal resolution of 5 minutes [Rideout and Coster, 2006] and has good data coverage in European and American sectors. VTEC maps with such a high spatiotemporal resolution are suitable to reveal the structures of traveling ionospheric disturbances [Zhang et al., 2017].

The Doppler shift data observed at two high frequency (HF) Doppler sounding stations in China is collected, of which the station codes are MDT (40.4°N, 116.9°E), and SZT (22.6°N, 114.1°E). The sounding system continuously receives electromagnetic waves with a stabilized frequency of 10 MHz transmitted by the National Time Service Center (NTSC) (35.7°N, 109.6°E) to detect the ionospheric disturbances through the Doppler shifts of this standard frequency. These shifts are considered to be caused by ionospheric variations mainly around the reflecting point of the electromagnetic wave in the ionosphere. According to the geometrical relationships, the locations of the reflecting point for MDT and SZT are (38.0°N, 113.2°E) and (29.2°N, 111.8°E), respectively. These stations are marked in Figure 1 with colored stars.

In this study, ionograms from 8 ionosonde stations in China middle latitude are used to derive the

iso-frequency lines, which vary as a function of universal time and virtual height. The sample rate of the ionograms is 15 minutes. These ionosondes belong to the China Research Institute of Radio-wave Propagation (CRIRP) and their locations are marked in Figure 1 with green triangles. The virtual height data is manually scaled by ourselves to reduce possible errors of auto scaling [Krankowski et al., 2011; Habarulema and Carelse, 2016] from these ionograms with professional scaling software provided by CRIRP. During the scaling, we limited the frequency to be less than 7 MHz. In addition, the condition of the geomagnetic storm is shown with data from the high resolution (5 minutes) OMNI dataset, which is downloaded from the FTP service of the NASA Goddard Space Flight Center.

### 3. Results

#### 3.1 Observations

Figure 2 shows the variations of (a) solar wind speed, (b) interplanetary magnetic field (IMF)  $B_z$  component, (c) the SYM-H index, and (d) the AE index from the OMNI dataset, and the time range is from 18:00 UT, 16 March 2015 to 06:00 UT, 18 March 2015. It should be noted that the solar wind magnetic field and plasma data are time-shifted to the bow shock nose to better support the solar wind-magnetosphere coupling studies. It can be seen clearly that a geomagnetic storm occurred on 17 March 2015, with the sudden storm commencement (SSC) at  $\sim 04:45$  UT, which is characterized by a sharp increase (marked with vertical dashed lines) in the solar wind speed,  $B_z$ , and SYM-H index. The main phase of the storm can be roughly divided into two stages. The first stage is from  $\sim 06:00$  UT, when the IMF  $B_z$  component first turns to southward, to  $\sim 12:00$  UT, when the  $B_z$  turns southward again after back to northward for about 2 hours. After  $\sim 12:00$  UT, the  $B_z$  is southward for **most of the time**, until it enters the recovery phase. The SYM-H and AE indices show a similar two-stage feature as the  $B_z$ . SYM-H decreases after  $\sim 06:00$  UT, reaches the first minimum at  $\sim 09:30$  UT, and increases to a local maximum at  $\sim 12:00$  UT. Then, it gradually decreases with small oscillations and reaches the minimum value of  $-233$  nT at  $\sim 22:45$  UT. Correspondingly, the AE index exhibits the first increase period between 06:00 UT to 12:00 UT, with the maximum intensity of  $\sim 1000$  nT, and the second period between 12:00 UT to 02:00 UT of the next day, during which the AE increases much larger with several peaks. This storm is the strongest one in the 24th solar cycle [Astafyeva et al., 2015].

During the first stage of the main phase, disturbances are observed successively at MDT and SZT Doppler receiver stations. Figure 3 illustrates the variations of the Doppler shift records at (a) MDT and (b) SZT between 08:00 UT and 14:00 UT on 17 March 2015. **It shows that two distinct positive shifts occur at about 10:22 UT and 10:53 UT, respectively.** Shortly after, it exhibits two negative shifts but with much smaller amplitudes. Suppose these successive disturbances indicate a propagating perturbation, according to the estimated locations of the reflecting points that mention above and the occurrence time of the two positive peaks, **the approximate speed of this perturbation is about 535 m/s.** This value is much larger than the speed of the movement of the ionospheric negative storm that usually occurs in the middle latitude due to storm-induced equatorward wind [Buonsanto, 1999], and the ionospheric storm is not serious in the Asian sector during this period [Astafyeva et al., 2015]. **Considering the magnitude of the speed and the time interval of the positive-negative variations, the recorded perturbations probably reflect an equatorward propagating LSTID in the East Asian sector.**

To confirm this, Figure 4 presents a sequence of 2D VTECP maps between 09:40-11:40 UT on 17 March 2015 with the method described in section 2. The grey areas represent the nightside. The raw value of VTECP has already been converted into VTECP' with the equation

$$\text{VTECP}' = \text{sgn}(\text{VTECP}) * \log_{10}(\text{abs}(\text{VTECP}) + 1) \quad (3)$$

The raw amplitude of VTECP above 30°N is ~ 2 TECu while the raw amplitude of VTECP below 30°N (dip latitude) reaches ~ 10 TECu. So, transform (3) provides a better colormap for 2D VTECP plots by sharpening the edges between positive and negative values and reduce the differences of VTECP in middle and low latitudes. Consequently, it should be noted that the amplitude of the wavelike variation does not represent the true wave amplitude but an “artificial” one. The yellow lines illustrate the least square fitting results for all the negative pixels within certain rectangular areas bounded by longitudes and latitudes. The green lines are similar but for pixels with the bottom 5% absolute VTECP' values in selected areas (see section 3.2 for a detailed example). These two kinds of lines mark the approximate locations of the wavefronts.

A large-scale wavelike perturbation can be seen clearly in Figure 4. The first relatively distinct wave structure emerges during the (d) 10:10-10:20 UT period, while its sign can already be observed as early as (a) 09:40-09:50 UT in the northwest part of China. During (e) 10:20-10:30 UT, a negative band occurs across both the Chinese and Japanese sectors between around 30°N-45°N, which gradually propagates to lower latitudes in the next tens of minutes. During (f) 10:30-10:40 UT, the first clear wavefront of the positive band appears, which also shows an equatorward movement for at least half an hour. Finally, there seems to be no distinct wave structure following the positive band. Considering the spatiotemporal characteristics of this perturbation, it can be preliminarily identified as an LSTID. By the way, it is interesting to note that the positive bands do not extend to the Japanese sector in (h) and (i), and the corresponding VTECP' amplitudes seem smaller in the East side than in the West side. This may be related to the fact that the Japanese sector has already entered the nightside.

Both the negative and positive bands exhibit more complex variations when they enter the equatorial ionospheric anomaly (EIA) region between 20°N-30°N. On the one hand, the amplitude of VTECP' is relatively larger than those in the higher latitudes. On the other hand, it seems that the equatorward propagation of the negative band decelerates significantly in this area, which is especially shown in (Figure 4, g-l). Such complex features are probably related to the various physical processes in this region. Ding et al. [2012] suggest that LSTIDs experience severe dissipation in South China region due to viscosity and heat conductivity at low latitudes, which may account for the weakening of the equatorward propagating wavelike structures. Besides, Pradipta et al. [2016] studied the interaction of the auroral LSTIDs from opposite hemispheres near the dip equator during the 26 September 2011 geomagnetic storm. It shows that such interaction may bring much complexity to the TEC perturbations near the dip equator.

Our observations of the Doppler shift and VTECP' maps are in good agreement. To show it clearly, Figure 5 shows the variations of the mean VTECP' data near the Doppler reflection points with the same time range of Figure 3. Doppler shift recordings in Figure 3 are also plotted with dashed lines for comparison. It can be seen that the troughs at around 10:20 UT in (a) and 10:50 UT in (b) correspond well to the two distinct crests in Figure 3. In addition, the variations of the VTECP' between 11:00 and 14:00 are also in a good negative correlation with the Doppler shift



observations for each reflecting point. It should be noted that the variation of VTECP' at the reflecting point 1 exhibits more variability than that at the reflecting point 0, especially around 09:00 UT, 10:00 UT, and 12:00 UT. Considering that point 1 (29.2°N, 111.8°E) is approaching the EIA region, the causes for VTEC perturbations are more complicated as mentioned above. This feature is consistent with the observations of the 2D VTECP' maps in Figure 4.

Ionospheric parameters from ionograms have been commonly used since early TID studies. Recently, ionograms and iso-frequency lines with different sampling rates were used in TID studies [Klausner et al., 2009; Ding et al., 2012, 2013; Pradipta et al., 2015; Ramsingh et al., 2015; Habarulema et al., 2018]. Figure 6 presents the temporal variations of the virtual height for each iso-frequency line. The names and locations of the corresponding ionosondes are given in each subplot as annotates. The sampling frequency are marked on the right side for each line. On the left column, the results of five stations are arranged in order from high to lower latitudes, and on the right column, it shows the recordings of four stations in the same latitudinal belt. We can see clearly that a distinct uplift of the virtual height occurs at 09:45 UT at Manzhouli station, and it gradually moves equatorward from high to lower latitudes (Figure 6, a-e). Meanwhile, the phase difference is not observed for the stations on the right column. This means that the ionospheric disturbance roughly moves along the meridian line in this longitudinal sector (around 115°E), which corresponds to the results of the 2D VTECP' map. Moreover, although the time resolution of 15 minutes is relatively low, it can still be identified that the crests in the higher iso-frequency lines appear earlier than those in the lower ones. Such trends (marked with black dashed lines) indicate a downward vertical phase velocity, which is one of the typical characteristics of TID and AGW [Hine, 1960; Hocke and Schlegel, 1996]. It should be noted that the downward trend is not much clear for certain station, especially the one in Qingdao. This may be attributed to the 15 minutes sampling interval.

### 3.2 Estimating Propagation Parameters

As preparation for estimating the propagation parameters of this LSTID, Figure 7 shows a detailed example of the wavefront fitting method with the VTECP' map in Figure 4(g) (10:40-10:50 UT). The reason for choosing this period is that the structure of the wavefront is relatively clear, and the boundary of the positive and negative wave band in the Japanese sector can still be partly identified. The green line is the least square fitting for the green dots, of which the absolute VTECP' values are close to zero (bottom 5%) among all the dots in a certain region (75°E-140°E, 30°N-40°N). The wave propagating azimuth (marked with arrows) can be estimated with the normal direction of this fitting line. Results are listed in Table 1 in the second column.

It can be seen clearly that the TID moves due South around 110°E, and in the West/East region, the propagation direction is slightly South by West/East. It should be noted that the morphology of this TID is continuously changing as it moves from high to lower latitudes in the studied region. Although the azimuths are estimated only with the wavefront data during 10:40-10:50 UT, such longitudinal dependence of azimuths corresponds well with other fitting lines in Figure 4(e, f, g, h).

In order to derive the phase speed, period, and wavelength of this LSTID, the time-latitude plots (TLPs) of VTECP' are obtained for six longitudinal bands, which are marked with dashed rectangles A-F in Figure 7. For each band, the VTECP' data is averaged along the latitude for

every 6 minutes (0.1 hours), and the results as a function of UT and latitude are illustrated correspondingly in Figure 8 (a-f). As mentioned before, the VTECP' variation related to EIA is rather complex. Considering that EIA is mainly a low-latitudinal phenomenon, the 30°N is marked with dashed lines in Figure 8 which indicate the boundary of EIA. Only values over 30°N are used to estimate the speed.

As expected, the most distinctive structures in all panels are the pair of negative and positive bands around 10:40 UT, which correspond to the perturbations moving from high to lower latitudes shown in Figure 4. The structures in the 130°E-140°E are not quite clear, which may be due to the lack of data in some parts of this area, but the trough around 10:40 UT can still be identified. To estimate the meridional phase speeds of these perturbation patterns, the linear least square method is used to fit the pairs of troughs and crests. The data points for the linear fitting are marked with white dots, which are the minimum/maximum values along with each latitudinal bin around the negative/positive structures that we focus on. The phase speeds for wave troughs ( $V_t$ ) and crests ( $V_c$ ) can be derived based on the slopes of the fitting lines. Moreover, the period of the wave can be estimated through the time interval between the trough and crest in TLPs. In practice, for each longitudinal region, the average of time lags along all latitudinal bins is set to be the half period of the wave in this region. As for the estimation of wavelength, note that the studied area is  $\sim 20^\circ$  in latitude, which is roughly one wavelength and thus make it difficult to estimate the wavelength directly from the 2D VTECP' map. So, the wavelength is derived from the multiplication of speed and period.

However, those speed, period, and wavelength are the projections on longitudes. After adjusted by the propagation azimuths that were calculated above, the final results of the estimated parameters are listed in Table 1. It can be seen that these parameters show certain longitudinal dependence. It should be noted that the data coverage is relatively lower in the east and west boundaries of the investigated region. This may impact the accuracy of the estimation of the LSTID properties in these areas. Besides, the mean values and standard deviations of the period,  $V_t$ ,  $V_c$ , and wavelength are  $74.8 \pm 1.4$  minutes,  $578 \pm 16$  m/s,  $617 \pm 23$  m/s, and  $2691 \pm 80$  km, respectively. These parameters are typical for an LSTID.  $V_t$  and  $V_c$  overlap, although only marginally, considering the error ranges. Meanwhile, the mean  $V_c$  is slightly larger than the mean  $V_t$ , which seems like the wave behind is pushing that ahead. In general, the speed of trough and crest of the LSTID should be rather the same since they are induced by the same gravity wave. However, the wave properties might change with time dependent on the forcing from background condition, especially for LSTID covering large spatial region. This might explain the differences.

In addition, it is interesting to note that  $V_t$  is in reasonable agreement with the result of 535 m/s derived from the Doppler recordings. To show it more specifically, we estimated the speed and direction of the LSTID using the same TLP method as Figure 8 but in 111°E-114°E and 29°N-38°N (corresponding to the reflecting points). The result is  $562 \pm 59$  m/s and  $0^\circ$ , respectively. In general, the LSTID velocity estimated from ground-based stations tend to be larger than the actual velocity since these stations, in most cases, are not in perfect alignment with the propagation direction of the LSTID [Afraimovich et al., 1998; Habarulema et al., 2013]. Such good agreement between VTECP' and HF Doppler results may be attributed to the fact that the reflecting points (29.2°N, 111.8°E; 38.0°N, 113.2°E) of the Doppler receivers are in a narrow longitudinal band and the direction of the LSTID's propagation is also almost due south between



111 E-114 E.

As mentioned above, the VTECP' in the EIA region seems to exhibit different features compared to that in the middle latitude. It can be seen from Figure 8(c) that VTECP' in this region also shows a periodic variation, but it seems to have longer period and time duration than the LSTID. These disturbances are probably related to the complex variations of VTEC after 08:00 UT (around dusk). Besides, the perturbations at 20°N around 12:00 UT and 13:00 UT show patterns of poleward movement. Habarulema et al. [2018] have identified TIDs in the Asian-Australian sector during the same storm period. It provides clear examples of TIDs crossing the dip equator from the southern hemisphere to the northern hemisphere around 09:00-12:00 UT. Their analysis shows that these TIDs may not have exceeded 30°N. Such poleward feature is also detected in other longitudinal sectors during this storm [Zakharenkova et al., 2016] and other storms [Pradipta et al., 2016; Jonah et al., 2018]. In addition, Ding et al. [2013] have studied the poleward-propagating LSTIDs in southern China during a medium-scale storm in 2011. They attribute their observations to the excitation of secondary LSTIDs during the dissipation of primary disturbances from the lower atmosphere. Besides, the poleward-moving disturbances may also be induced by the variation of the equatorial electrojet as pointed out by Chimonas [1970] and more recently by Habarulema et al. [2016]. A detailed investigation of this phenomenon is not the focus of this work.

#### 4. Discussion

Our results show that the propagation parameters of the LSTID in the East Asian sector during the St. Patrick's Day storm are longitudinal dependent. Among these parameters, the longitudinal dependence of the propagation azimuth of an LSTID receives much attention in previous works. In general, earlier studies suggest that there are four main factors that affect the direction of a polar originated LSTID, which are the velocity of the background neutral wind [Hines, 1960; Morton and Essex, 1978; Maeda and Handa, 1980], the structure and evolution of the source region in the auroral oval [Maeda and Handa, 1980; Hunsucker, 1982; Ding et al., 2007], the Coriolis force [Maeda and Handa, 1980; Balthazor and Moffett, 1999; Afraimovich et al., 2000; Tsugawa et al., 2004; Ding et al., 2013], and the declination of geomagnetic field [Tsugawa et al., 2004; Borries et al., 2009].

The Coriolis force effect is generally believed to contribute to the clockwise shift of the propagation direction of the LSTIDs [Afraimovich et al., 2000; Tsugawa et al., 2004; Ding et al., 2013]. The observations of the shift (10°-20° on average) are consistent with the calculation by Maeda and Handa [1980] and the model simulation by Balthazor and Moffett [1999]. However, in our study, the shift of the propagation direction is not systematic westward, which means the variability of the LSTID azimuth in our observation cannot be attributed to the Coriolis force, at least not to it alone.

The structure/movement of the source region for the LSTID in the auroral oval is another candidate for explaining the longitudinal dependence of the propagation direction of the LSTID. Previous studies have suggested that the westward movement of enhanced electrojets in the auroral arc is an important cause of the westward shift of the LSTID propagation direction at high

latitudes [Hunsucker, 1982; Ding et al., 2007]. The change of the propagation direction of LSTIDs as they move from high to middle latitudes during the superstorm of 29 October 2003 over North America, was explained by Ding et al. [2007] as related to a change in the position of the electrojet enhancement area near the auroral oval. Nevertheless, since the structure and the evolution process of the source region during storm period is complicated, more cases and modeling studies are needed to find a clear connection between it and the propagation direction of LSTIDs.

In general, the velocity of the neutral wind is much less than that of the LSTIDs, and the thermospheric wind velocity in the same latitudinal belt with a limited longitudinal extension should exhibit little variance. So, the contribution of the background wind on the change of the propagating direction would be limited in the absence of the geomagnetic field. However, a combined effect of magnetic declination and zonal wind can cause F region electron density differences between two sides of the zero declination [Zhang et al., 2011]. During storm periods, the enhanced zonal winds [Fuller-Rowell et al., 1994] can intensify these differences [Thomas et al, 2016]. As a result, the geomagnetic declination is considered to be an important factor that affects the propagation direction of the LSTID. Some researchers have studied the predominant propagation direction of LSTIDs during storm periods in different longitudinal sectors, and suggest that, statistically speaking, the predominant directions of LSTID in Europe, China and Japan are primarily southward, South to West and South to East, respectively [Nicolls et al, 2004; Tsugawa et al, 2004; Borries 2009; Ding et al, 2013]. These results are all consistent with the corresponding geomagnetic declination in each sector.

In the longitudinal region of 70°E-150°E, the geomagnetic declination angles change from North by East in the West side to North by West in the East side. This characteristic seems to show some kind of consistent with the azimuth results in Table 1. To illustrate such connection quantitatively, Figure 9 depicts the (a) the geomagnetic declination on the wavefront in different longitudes in Figure 7 and (b) the propagation direction (azimuth-180°) of the LSTID at the same spot. The connection between these two parameters is quite obvious in this event. This result manifests that the propagation of LSTIDs in different longitudes is probably influenced by the orientation of the geomagnetic field lines in the East Asian sector. **In addition, the tendency of field-aligned propagation of the LSTID indicates that it is driven by the neutral winds since the winds push the plasma up and down along the magnetic field lines. There is no evidence, such as simultaneous perturbations at all latitudes in other cases [Borries et al., 2016; Zakharenkova et al., 2016], to show that the LSTID in the Chinese/Japanese sector is affected by prompt penetration electric field (PPEF) during the same period. Besides, considering the relatively low data coverage in the East/West side of the studied region, it should be noted that our speculation needs to be verified with more observational data and numerical simulation to reduce uncertainty in our propagation estimation and to figure out the detailed physical processes.**

During the 2015 St. Patrick's Day storm, LSTIDs in the European-African, American and Asian-Australian sectors are detected and analysed with TEC observations [Borries et al., 2016; Zakharenkova et al., 2016; Habarulema et al., 2018]. It shows clearly in their results that the European sector also exhibits LSTIDs around 11:00 UT. As a comparison, we also analysed these LSTIDs but with VTEC data from the Madrigal database of the MIT Haystack Observatory. This database has good spatiotemporal coverage for the European and American sectors. To derive the

VTECP, a narrow longitudinal band (10°E-20°E, 30°N-70°N) is first selected and the VTEC data with the same latitude at the same time is average. At each latitude bin, the averaged VTEC forms a time series and the temporal resolution is reset to 12 minutes (0.2 hours) with bin averaging. Then, a running mean with a 1.5 hours window is conducted for each time series and their difference is taken as the VTECP. The result is plotted in Figure 10 as a TLP. The fitting lines are obtained with the same method as those in Figure 8.

Figure 10 is basically consistent with previous results, such as the synchronous perturbations around 04:45 UT and 09:15 UT, and the LSTID structures between 10:00 UT and 17:00 UT. Moreover, our result shows that the VTECP' behavior between 60°N and 70°N is quite different from below. The pattern around 10:00 UT seems to represent a TID with smaller phase speed. Considering the physical processes are more complex in such high latitudes [Foster et al., 2014], we only focus on the perturbations below 60°N. The phase speeds estimated from the most distinct crest and trough are  $\sim 500 \pm 51$  m/s and  $\sim 427 \pm 55$  m/s, respectively, and the estimated period is  $\sim 4.0 \pm 0.2$  hours. It is clear that the appearances of the LSTIDs are different in the European and the East Asian sectors during the same UT period for the same storm event. Borries et al. [2016] present a detailed study on the LSTID in Europe during this storm. It is suggested that the perturbation occurring around 11:00 UT is special since it is impacted by PPEF and wind at the same time. Comparatively, the LSTID in the Chinese/Japanese sector seems only driven by winds. This may partly account for the longitudinal difference in our results. Besides, such difference may also be related to the location or structure of the Joule heating source in the auroral oval or the difference of the background TEC in the two sectors. For better understanding this difference, more studies on the Joule heating source are needed.

## 5. Summary

Using data from 4 GPS receiver networks (CMGN, CMONOC, GEONET, IGS), together with recordings of 2 HF Doppler shift stations and 8 ionosondes, we provide comprehensive and detailed observation results of the LSTIDs in the East Asian sector during the 2015 St. Patrick's Day storm. The GPS receiver networks in China and Japan are combined together to produce 2D VTEC perturbation maps in order to give a wider image of the LSTID structures in the East Asia. As a comparison, the ionospheric disturbances in the European sector are also studied with VTEC data from the Madrigal database. The propagation parameters of the LSTIDs are estimated. Main results can be summarized as follows:

(1) A trough of LSTID occurs and propagates from high to lower latitudes during 09:40-11:20 UT, which spans over 60° in longitude. It is followed by a crest of LSTID that characterized by a clear tendency to dissipate starting from the East side. These features are in good agreement with observations by HF Doppler shift stations and ionosondes

(2) The propagation orientation is almost due southward around 105°E-115°E, and it tends to slightly shift westward/eastward in the West/East part of the studied area. This is expected to be influenced by the regional declination of the geomagnetic field lines.

(3) The propagation parameters in different longitudinal bands are estimated. These parameters show certain longitudinal differences. Besides, the mean values and standard deviations of the

1 period,  $V_t$ ,  $V_c$ , and wavelength are  $74.8 \pm 1.4$  minutes,  $578 \pm 16$  m/s,  $617 \pm 23$  m/s, and  $2691 \pm 80$   
2 km, respectively.

3 It should be noted that our results show certain consistency with previous works focusing on the  
4 Chinese or Japanese sector for different LSTID events. Nevertheless, the longitudinal dependence  
5 shown in our results should be examined further with more case studies based on large  
6 longitudinal and high-resolution coverage of GPS data.

#### 7 8 9 **Acknowledgement:**

10 We are grateful to the International GPS Services (IGS) (<ftp://cddis.gsfc.nasa.gov>). The GPS data  
11 from CMONOC and CMGN networks are provided by the China Earthquake Administration  
12 (CEA) and the China Meteorological Administration (CMA), respectively. The GPS data from  
13 GEONET are provided by the Geographical Survey Institute, Japan. GPS TEC data products and  
14 access through the Madrigal distributed data system (<http://cedar.openmadrigal.org/>) are provided  
15 to the community by the Massachusetts Institute of Technology under support from the US  
16 National Science Foundation grant AGS-1242204. The HF Doppler records are from the Chinese  
17 Meridian Project. The ionosonde data are provided by the China Research Institute of Radio wave  
18 Propagation (CRIRP). We thank the NASA/GSFC's Space Physics Data Facility's OMNIWeb  
19 service (<https://spdf.gsfc.nasa.gov>) for data of the interplanetary and SYM-H parameters. This  
20 research was supported by the National Natural Science Foundation of China (No. 41674157).

## References

- Afraimovich, E. L., Palamartchouk, K. S., and Perevalova, N. P.: GPS radio interferometry of travelling ionospheric disturbances. *Journal of Atmospheric and Solar-Terrestrial Physics*, 60(12), 1205-1223, 1998.
- Afraimovich, E. L., Kosogorov, E. A., Leonovich, L. A., Palamartchouk, K. S., Perevalova, N. P., and Pirog, O. M.: Determining parameters of large-scale traveling ionospheric disturbances of auroral origin using GPS-arrays. *Journal of Atmospheric and Solar-Terrestrial Physics*, 62(7), 553-565, 2000.
- Astafyeva, E., Zakharenkova, I., and Förster, M.: Ionospheric response to the 2015 St. Patrick's Day storm: A global multi-instrumental overview. *Journal of Geophysical Research: Space Physics*, 120(10), 9023-9037, 2015.
- Balthazor, R. L. and Moffett, R. J.: Morphology of large-scale traveling atmospheric disturbances in the polar thermosphere. *Journal of Geophysical Research: Space Physics*, 104(A1), 15-24.
- Borries, C., Jakowski, N., & Wilken, V. (2009). Storm induced large scale TIDs observed in GPS derived TEC. *Ann. Geophys*, 27(4), 1605-1612, 1999.
- Borries, C., Mahrous, A. M., Ellahouy, N. M., and Badeke, R.: Multiple ionospheric perturbations during the Saint Patrick's Day storm 2015 in the European - African sector. *Journal of Geophysical Research: Space Physics*, 121(11), 11-333, 2016.
- Borries, C., Jakowski, N., Kauristie, K., Amm, O., Mielich, J., and Kouba, D.: On the dynamics of large-scale traveling ionospheric disturbances over Europe on 20 November 2003. *Journal of Geophysical Research: Space Physics*, 122(1), 1199-1211, 2017.
- Buonsanto, M. J.: Ionospheric storms—A review. *Space Science Reviews*, 88(3-4), 563-601, 1999.
- Cherniak, I. and Zakharenkova, I.: Large-Scale Traveling Ionospheric Disturbances Origin and Propagation: Case Study of the December 2015 Geomagnetic Storm. *Space Weather*, 16(9), 1377-1395, 2018.
- Chimonas, G.: The equatorial electrojet as a source of long period travelling ionospheric disturbances. *Planetary and Space Science*, 18(4), 583-589, 1970.
- Coster, A. J. and Gaposchkin, E. M.: Use of GPS pseudo-range and phase data for measurement of ionospheric and tropospheric refraction. In *Institute of Navigation Satellite Division, 2nd International Technical Meeting* (pp. 439-443), 1989.
- Ding, F., Wan, W., Ning, B., and Wang, M.: Large-scale traveling ionospheric disturbances observed by GPS total electron content during the magnetic storm of 29-30 October 2003. *Journal of Geophysical Research: Space Physics*, 112(A6), 2007.
- Ding, F., Wan, W., Liu, L., Afraimovich, E. L., Voeykov, S. V., and Perevalova, N. P.: A statistical study of large-scale traveling ionospheric disturbances observed by GPS TEC during major magnetic storms over the years 2003–2005. *Journal of Geophysical Research: Space Physics*, 113(A3), 2008.
- Ding, F., Wan, W., Ning, B., Zhao, B., Li, Q., Zhang, R., Xiong, B., and Song, Q.: Two-dimensional imaging of large-scale traveling ionospheric disturbances over China based on GPS data. *Journal of Geophysical Research: Space Physics*, 117(A8), 2012.
- Ding, F., Wan, W., Ning, B., Zhao, B., Li, Q., Wang, Y., Hu, L., Zhang, R., and Xiong, B.: Observations of poleward-propagating large-scale traveling ionospheric disturbances in southern China. In *Annales Geophysicae* (Vol. 31, No. 2, p. 377). Copernicus GmbH, 2013.

- 1 Ding, F., Wan, W., Li, Q., Zhang, R., Song, Q., Ning, B., Liu, L., Zhao, B., and Xiong, B.:  
2 Comparative climatological study of large-scale traveling ionospheric disturbances over  
3 North America and China in 2011–2012. *Journal of Geophysical Research: Space*  
4 *Physics*, 119(1), 519-529, 2014.
- 5 Figueiredo, C. A. O. B., Wrasse, C. M., Takahashi, H., Otsuka, Y., Shiokawa, K., and Barros, D.:  
6 Large-scale traveling ionospheric disturbances observed by GPS dTEC maps over North and  
7 South America on Saint Patrick's Day storm in 2015. *Journal of Geophysical Research: Space*  
8 *Physics*, 122(4), 4755-4763, 2017.
- 9 Foster, J. C., Erickson, P. J., Coster, A. J., Thaller, S., Tao, J., Wygant, J. R., and Bonnell, J. W.:  
10 Storm time observations of plasmasphere erosion flux in the magnetosphere and  
11 ionosphere. *Geophysical Research Letters*, 41(3), 762-768, 2014.
- 12 Fuller-Rowell, T. J., Codrescu, M. V., Moffett, R. J., and Quegan, S.: Response of the  
13 thermosphere and ionosphere to geomagnetic storms. *Journal of Geophysical Research:*  
14 *Space Physics*, 99(A3), 3893-3914, 1994.
- 15 Habarulema, J. B., Katamzi, Z. T., and McKinnell L.-A.: Estimating the propagation  
16 characteristics of largescale traveling ionospheric disturbances using ground-based and  
17 satellite data, *J. Geophys. Res. Space Physics*, 118, 7768–7782, 2013.
- 18 Habarulema, J. B. and Carelse, S. A.: Long-term analysis between radio occultation and ionosonde  
19 peak electron density and height during geomagnetic storms. *Geophysical Research Letters*,  
20 43(9), 4106-4111, 2016.
- 21 Habarulema, J. B., Katamzi, Z. T., and Yizengaw, E.: First observations of poleward large-scale  
22 traveling ionospheric disturbances over the African sector during geomagnetic storm  
23 conditions. *Journal of Geophysical Research: Space Physics*, 120(8), 6914-6929, 2015.
- 24 Habarulema, J. B., Katamzi, Z. T., Yizengaw, E., Yamazaki, Y., and Seemala, G.: Simultaneous  
25 storm time equatorward and poleward large-scale TIDs on a global scale. *Geophysical*  
26 *Research Letters*, 43(13), 6678-6686, 2016.
- 27 Habarulema, J. B., Yizengaw, E., Katamzi-Joseph, Z. T., Moldwin, M. B., and Buchert, S.: Storm  
28 Time Global Observations of Large - Scale TIDs From Ground - Based and In Situ Satellite  
29 Measurements. *Journal of Geophysical Research: Space Physics*, 123(1), 711-724, 2018.
- 30 Hines, C. O.: Internal atmospheric gravity waves at ionospheric heights. *Canadian Journal of*  
31 *Physics*, 38(11), 1441-1481, 1960.
- 32 Ho, C. M., Mannucci, A. J., Lindqwister, U. J., Pi, X., and Tsurutani, B. T.: Global ionosphere  
33 perturbations monitored by the worldwide GPS network. *Geophysical Research*  
34 *Letters*, 23(22), 3219-3222, 1996.
- 35 Hocke, K. and Schlegel, K.: A review of atmospheric gravity waves and travelling ionospheric  
36 disturbances: 1982-1995. In *Annales Geophysicae* (Vol. 14, No. 9, p. 917), 1996.
- 37 Hunsucker, R. D.: Atmospheric gravity waves generated in the high-latitude ionosphere: A  
38 review. *Reviews of Geophysics*, 20(2), 293-315, 1982.
- 39 Jonah, O. F., Coster, A., Zhang, S., Goncharenko, L., Erickson, P. J., Paula, E. R., and Kherani, E.  
40 A.: TID observations and source analysis during the 2017 Memorial Day weekend  
41 geomagnetic storm over North America. *Journal of Geophysical Research: Space Physics*,  
42 123, 8749– 8765. <https://doi.org/10.1029/2018JA025367>, 2018.
- 43 Klausner, V., Fagundes, P. R., Sahai, Y., Wrasse, C. M., Pillat, V. G., and Becker-Guedes, F.:  
44 Observations of GW/TID oscillations in the F2 layer at low latitude during high and low



- solar activity, geomagnetic quiet and disturbed periods. *Journal of Geophysical Research: Space Physics*, 114(A2), 2009.
- Klobuchar, J. A.: Design and characteristics of the GPS ionospheric time delay algorithm for single frequency users. In *PLANS'86-Position Location and Navigation Symposium* (pp. 280-286), 1986.
- Krankowski, A., Zakharenkova, I., Krypiak-Gregorczyk, A., Shagimuratov, I. I., and Wielgosz, P.: Ionospheric electron density observed by FORMOSAT-3/COSMIC over the European region and validated by ionosonde data. *Journal of Geodesy*, 85(12), 949-964, 2011.
- Lanyi, G. E. and Roth, T.: A comparison of mapped and measured total ionospheric electron content using global positioning system and beacon satellite observations. *Radio Science*, 23(4), 483-492, 1988.
- Lyons, L. R., Nishimura, Y., Zhang, S. R., Coster, A. J., Bhatt, A., Kendall, E., and Deng, Y.: Identification of Auroral Zone Activity Driving Large-Scale Traveling Ionospheric Disturbances. *Journal of Geophysical Research: Space Physics*, 124(1), 700-714, 2019.
- Maeda, S. and Handa, S.: Transmission of large-scale TIDs in the ionospheric F2-region. *Journal of Atmospheric and Terrestrial Physics*, 42(9-10), 853-859, 1980.
- Mendillo, M. and Narvaez, C.: Ionospheric storms at geophysically-equivalent sites–Part 1: Storm-time patterns for sub-auroral ionospheres. In *Annales Geophysicae* (Vol. 27, No. 4, pp. 1679-1694). Copernicus GmbH, 2009.
- Morton, F. W. and Essex, E. A.: Gravity wave observations at a southern hemisphere mid-latitude station using the total electron content technique. *Journal of Atmospheric and Terrestrial Physics*, 40(10-11), 1113-1122, 1978.
- Nicolls, M. J., Kelley, M. C., Coster, A. J., González, S. A., and Makela, J. J.: Imaging the structure of a large-scale TID using ISR and TEC data. *Geophysical Research Letters*, 31(9), 2004.
- Pederick, L. H., Cervera, M. A., and Harris, T. J.: Interpreting observations of large-scale traveling ionospheric disturbances by ionospheric sounders. *Journal of Geophysical Research: Space Physics*, 122(12), 2017.
- Pradipta, R., Valladares, C. E., Carter, B. A., and Doherty, P. H.: Interhemispheric propagation and interactions of auroral traveling ionospheric disturbances near the equator. *Journal of Geophysical Research: Space Physics*, 121(3), 2462-2474, 2016.
- Ramsingh, Sripathi, S., Sreekumar, S., Banola, S., Emperumal, K., Tiwari, P., and Kumar, B. S.: Low - latitude ionosphere response to super geomagnetic storm of 17/18 March 2015: Results from a chain of ground - based observations over Indian sector. *Journal of Geophysical Research: Space Physics*, 120(12), 10-864, 2015.
- Richmond, A. D. and Roble, R. G.: Dynamic effects of aurora-generated gravity waves on the mid-latitude ionosphere. *Journal of Atmospheric and Terrestrial Physics*, 41(7-8), 841-852, 1979.
- Rideout, W. and Coster, A.: Automated GPS processing for global total electron content data. *GPS Solutions*, 10(3), 219-228, 2006.
- Saito, A., Fukao, S., and Miyazaki, S.: High resolution mapping of TEC perturbations with the GSI GPS network over Japan. *Geophysical research letters*, 25(16), 3079-3082, 1998.
- Saito, A., Nishimura, M., Yamamoto, M., Fukao, S., Kubota, M., Shiokawa, K., Otsuka, Y., Tsugawa, T., Ogawa, T., Ishii, M., Sakanoi, and T., Miyazaki, S.: Traveling ionospheric

disturbances detected in the FRONT campaign. *Geophysical Research Letters*, 28(4), 689-692, 2001.

Shiokawa, K., Otsuka, Y., Ogawa, T., Balan, N., Igarashi, K., Ridley, A. J., Knipp, D. J., Saito, A., and Yumoto, K.: A large-scale traveling ionospheric disturbance during the magnetic storm of 15 September 1999. *Journal of Geophysical Research: Space Physics*, 107(A6), SIA-5, 2002.

Song, Q., Ding, F., Wan, W., Ning, B., Liu, L., Zhao, B., Li, Q., and Zhang, R.: Statistical study of large-scale traveling ionospheric disturbances generated by the solar terminator over China. *Journal of Geophysical Research: Space Physics*, 118(7), 4583-4593, 2013.

Thomas, E. G., Baker, J. B. H., Ruohoniemi, J. M., Coster, A. J., and Zhang, S. R.: The geomagnetic storm time response of GPS total electron content in the North American sector. *Journal of Geophysical Research: Space Physics*, 121(2), 1744-1759, 2016.

Tsugawa, T., Saito, A., Otsuka, Y., and Yamamoto, M.: Damping of large-scale traveling ionospheric disturbances detected with GPS networks during the geomagnetic storm. *Journal of Geophysical Research: Space Physics*, 108(A3), 2003.

Tsugawa, T., Saito, A., and Otsuka, Y.: A statistical study of large-scale traveling ionospheric disturbances using the GPS network in Japan. *Journal of Geophysical Research: Space Physics*, 109(A6), 2004.

Tsugawa, T., Shiokawa, K., Otsuka, Y., Ogawa, T., Saito, A., and Nishioka, M.: Geomagnetic conjugate observations of large-scale traveling ionospheric disturbances using GPS networks in Japan and Australia. *Journal of Geophysical Research: Space Physics*, 111(A2), 2006.

Wan, W., Ning, B., Yuan, H., Li, J., Li, L., and Liang, J.: TID observation using a short baseline network of GPS receivers. *Acta Geodaetica et Geophysica Hungarica*, 32(3-4), 321-327, 1997.

Wang, C.: New Chains of Space Weather Monitoring Stations in China, *Space Weather*, 8, S08001, doi:10.1029/2010SW000603, 2010.

Zakharenkova, I., Astafyeva, E., and Cherniak, I.: GPS and GLONASS observations of large-scale traveling ionospheric disturbances during the 2015 St. Patrick's Day storm. *Journal of Geophysical Research: Space Physics*, 121(12), 2016.

Zhang, D. H. and Xiao, Z.: Study of ionospheric response to the 4B flare on 28 October 2003 using International GPS Service network data. *Journal of Geophysical Research: Space Physics*, 110(A3), 2005.

Zhang, D. H., Zhang, W., Li, Q., Shi, L. Q., Hao, Y. Q., and Xiao, Z.: Accuracy analysis of the GPS instrumental bias estimated from observations in middle and low latitudes. In *Annales Geophysicae* (Vol. 28, No. 8, pp. 1571-1580). Copernicus GmbH, 2010.

Zhang, S. R., Foster, J. C., Coster, A. J., and Erickson, P. J.: East-West Coast differences in total electron content over the continental US. *Geophysical Research Letters*, 38(19), 2011.

Zhang, S. R., Erickson, P. J., Goncharenko, L. P., Coster, A. J., Rideout, W., and Vierinen, J.: Ionospheric bow waves and perturbations induced by the 21 August 2017 solar eclipse. *Geophysical Research Letters*, 44(24), 12-067, 2017.

Zhang, W., Zhang, D. H., and Xiao, Z.: The influence of geo-magnetic storms on the estimation of GPS instrumental biases, *Ann. Geophys.*, 27, 1613-1623, doi:10.5194/angeo-27-1613-2009, 2009.

## Captions of Table and Figures

**Table 1.** The estimated propagation parameters of the LSTID and the corresponding standard errors. The second column contains the propagation directions, which are measured clockwise from the South.  $V_t/V_c$  represents the phase speed estimated with certain wave trough/crest.

**Figure 1.** Locations of the GPS stations of different networks (colored dots), the HF Doppler shift stations (green stars), the National Time Service Center of China (grey stars), and the ionosondes (green triangles) that used in this study.

**Figure 2.** Temporal variations of (a) the solar wind speed ( $V_{sw}$ ), (b) the IMF Bz component, (c) the SYM-H index, and (d) the AE index between 18:00 UT, 16 March 2015 and 06:00 UT, 18 March 2015. The occurrence of SSC is shown with vertical dashed lines.

**Figure 3.** Temporal variations of the HF Doppler shift records from (a) MDT and (b) SZT between 08:00 UT and 14:00 UT, 17 March 2015.

**Figure 4.** A series of 2D VTECP' maps over the East Asian sector from the period of 09:40-09:50 UT to 11:30-11:40 UT on 17 March 2015. The grey areas represent the nightside. The colorbar represents the VTECP' (units: TECu), which is transformed from the original VTECP value with equation (3) for a more viewer-friendly colormap. The green and yellow lines illustrate the least square fittings (order 2) for wavefronts.

**Figure 5.** Temporal variations of mean VTECP' near the Doppler reflection points between 08:00 UT and 14:00 UT, 17 March 2015. Doppler shift recordings in Figure 3 are plotted with dashed lines for comparison.

**Figure 6.** Temporal variations of the virtual height for iso-frequency lines from 8 ionosondes between 08:00 UT and 12:00 UT, 17 March 2015. Frequencies are depicted on each iso-frequency line. The time resolution is 15 min for all stations. The black dashed lines indicate the downward phase change.

**Figure 7.** A detailed example of the wavefront fitting method. Green dots indicate the data points for least square fitting. Green arrows depict the propagation orientations in different longitudes. Dashed black rectangles mark the areas for generating TLPs in Figure 8.

**Figure 8.** TLPs of VTECP' for different longitudinal bands between 07:00-14:00 UT. White dots give the data points for linear fitting, and the fitting results are marked with white lines. 30°N in (b-d, f) is marked with black dashed lines which indicate the boundary of EIA. 40°N is marked in (f).

**Figure 9.** The sketch of (upper) the geomagnetic declination angels and (lower) the propagation directions in different longitudes on the wavefront fitted in Figure 7. The propagation directions are measured clockwise from the South.

**Figure 10.** The TLP of VTECP' for the European sector (10°E-20°E, 30°N-70°N) between 01:00-23:00 UT. White lines and dots are similar to those in Figure 8. The black dashed line depicts 60°N.

1 **Table 1.**

| Lon. (°E) | Dir. (°) | Period (min)   | Vt (m/s)     | Vc (m/s)     | Wavelength (km) |
|-----------|----------|----------------|--------------|--------------|-----------------|
| 80-90     | -11.2    | $81.1 \pm 3.4$ | $500 \pm 40$ | $542 \pm 31$ | $2536 \pm 163$  |
| 90-100    | -7.1     | $77.6 \pm 5.2$ | $552 \pm 22$ | $670 \pm 44$ | $2845 \pm 222$  |
| 100-110   | -2.9     | $58.8 \pm 1.5$ | $587 \pm 47$ | $638 \pm 76$ | $2160 \pm 167$  |
| 110-120   | 1.3      | $62.4 \pm 2.0$ | $605 \pm 27$ | $562 \pm 25$ | $2184 \pm 99$   |
| 120-130   | 7.9      | $94.2 \pm 1.3$ | $647 \pm 39$ | $673 \pm 63$ | $3731 \pm 216$  |

2

3

1 Figure 1.

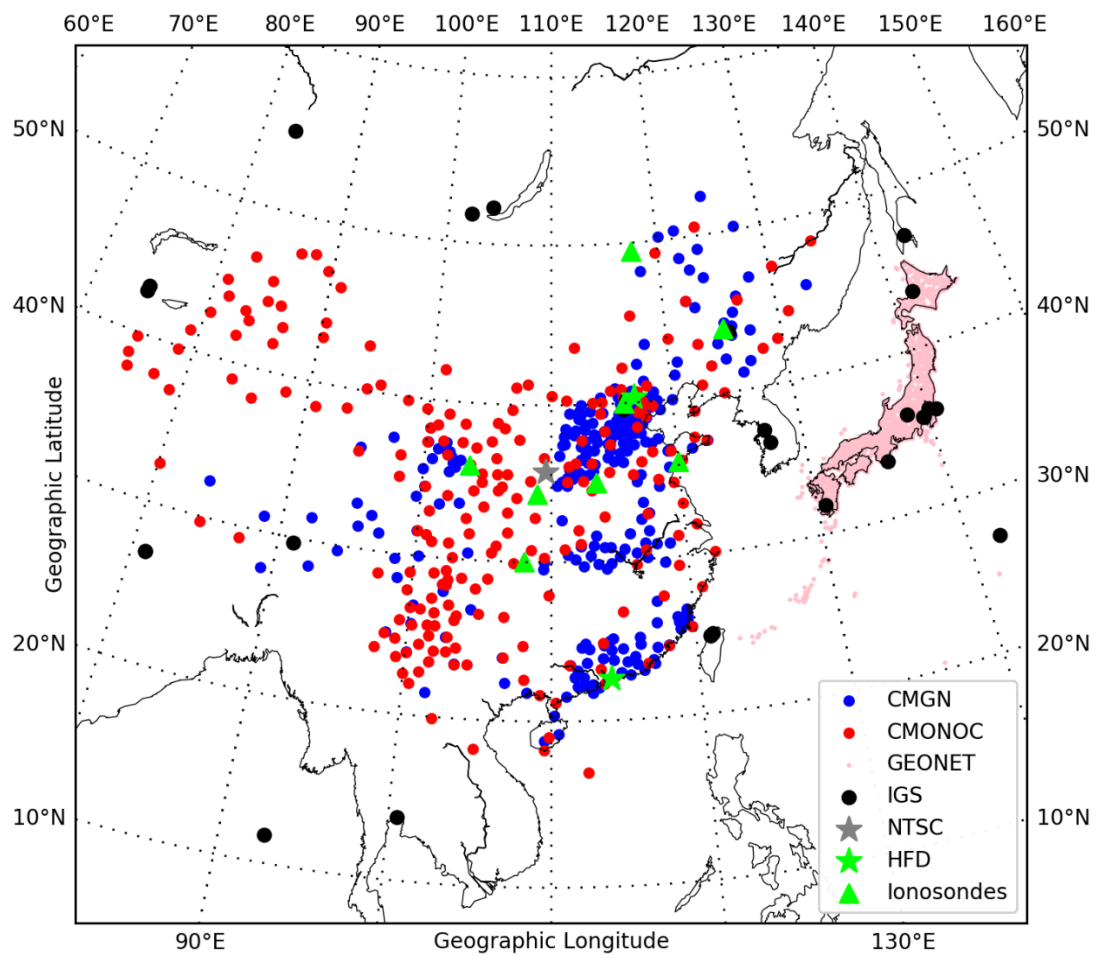

2

3

1 Figure 2.

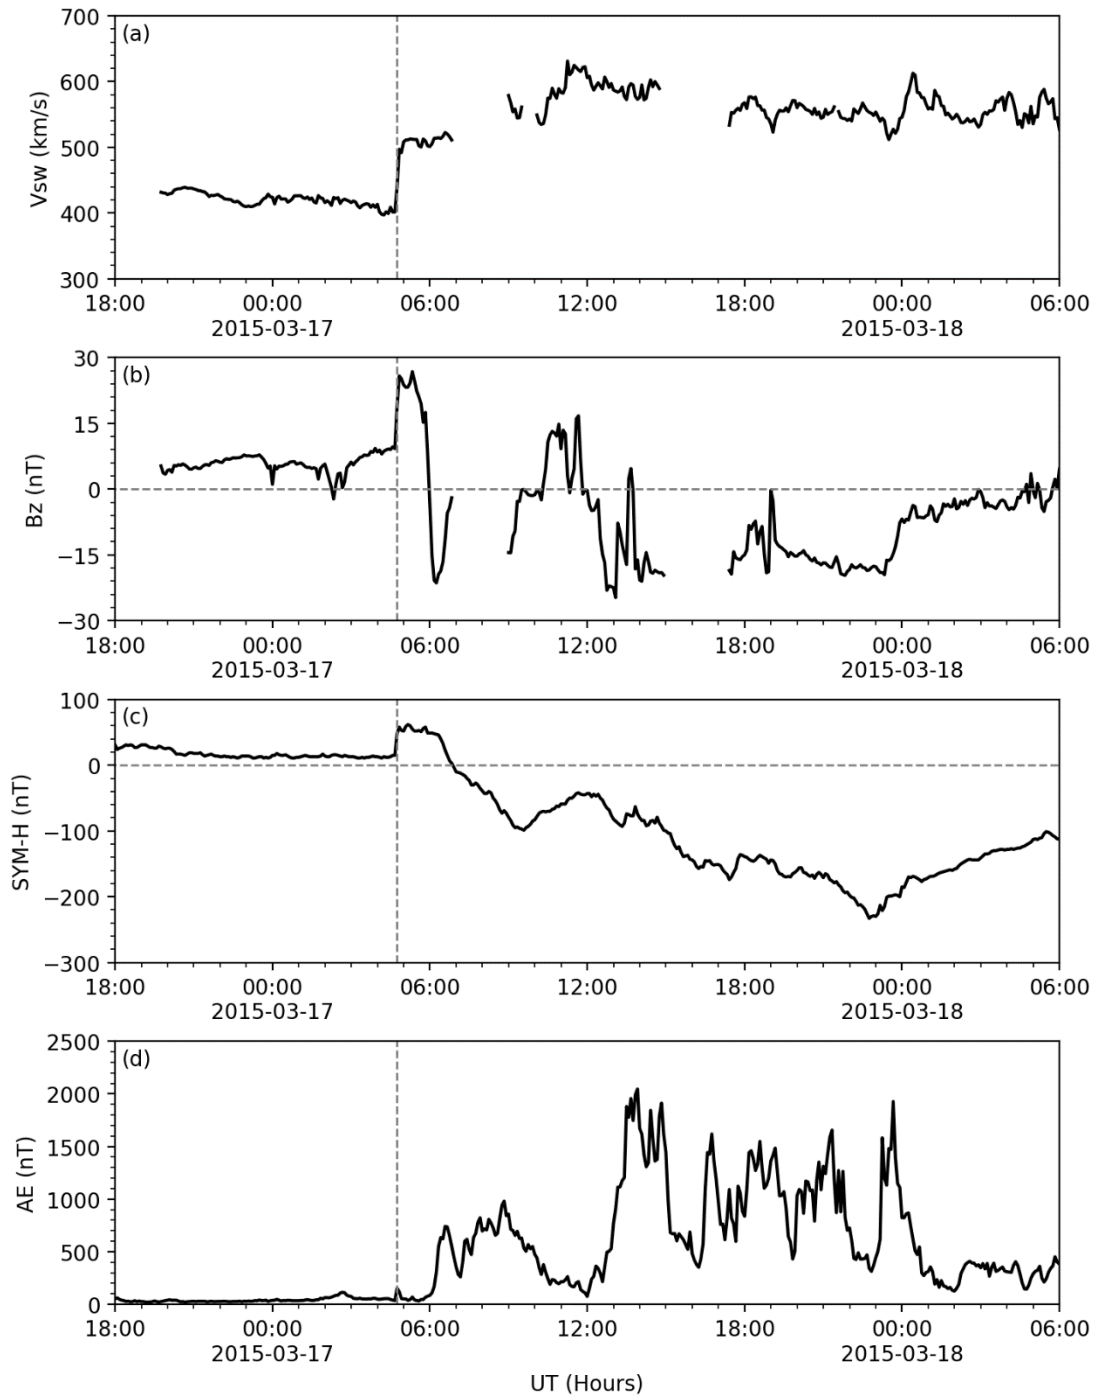

2

3

4



1    Figure 3.

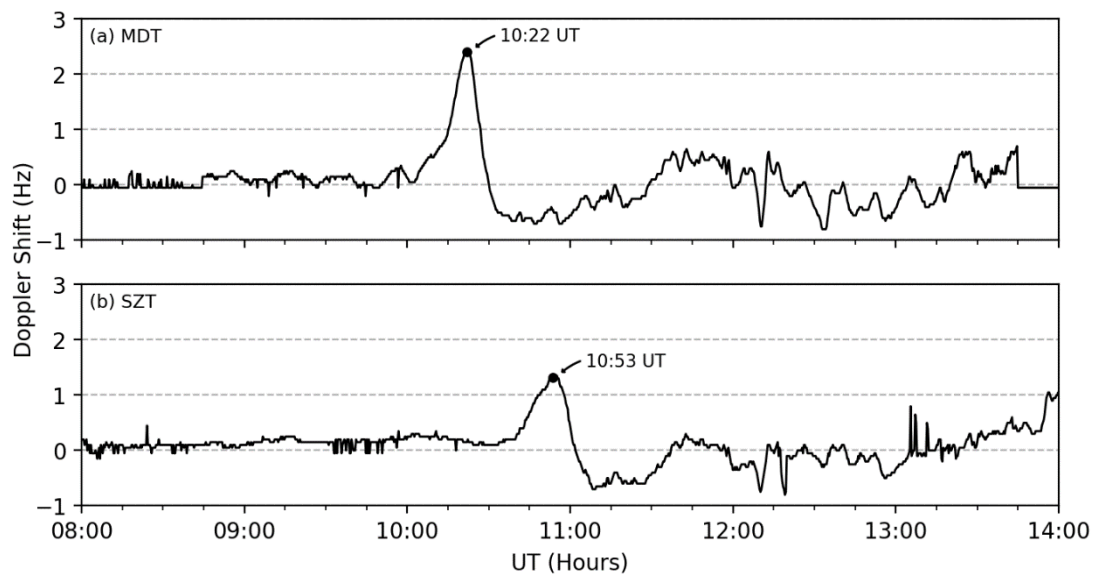

2

3

4

5

1 Figure 4.

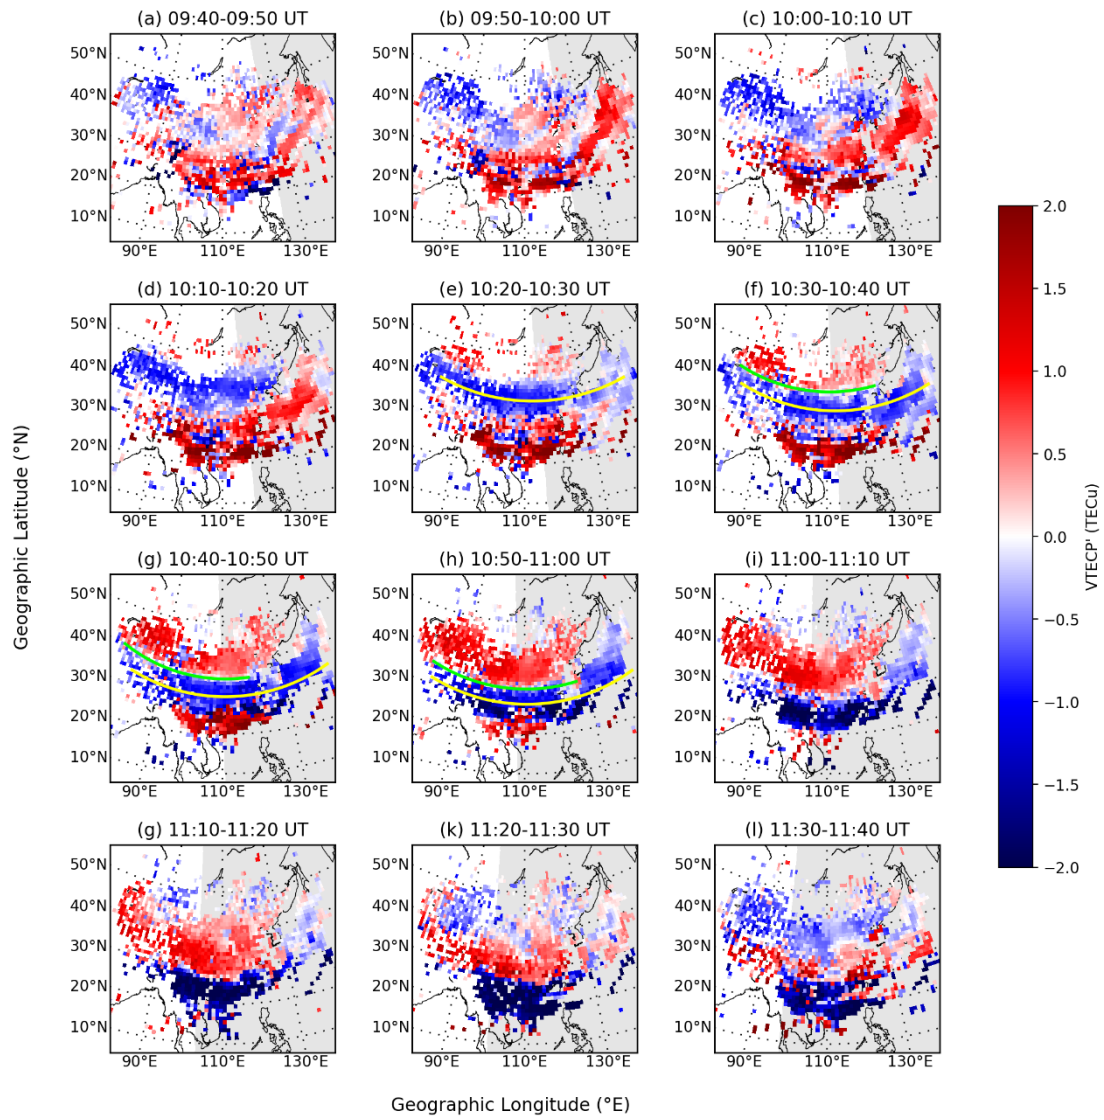

2

3

4

1 Figure 5.

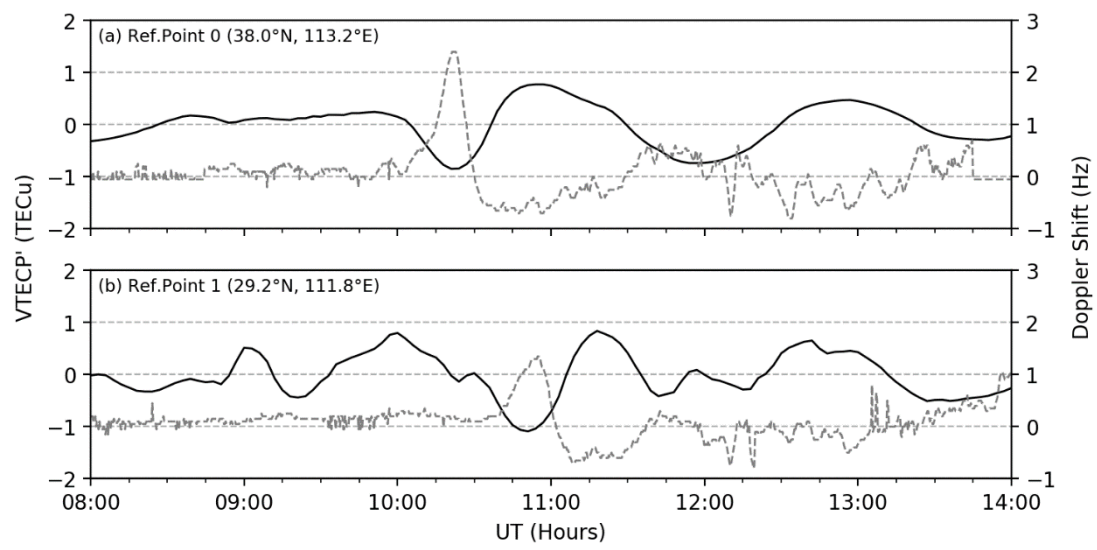

2

3

1 Figure 6.

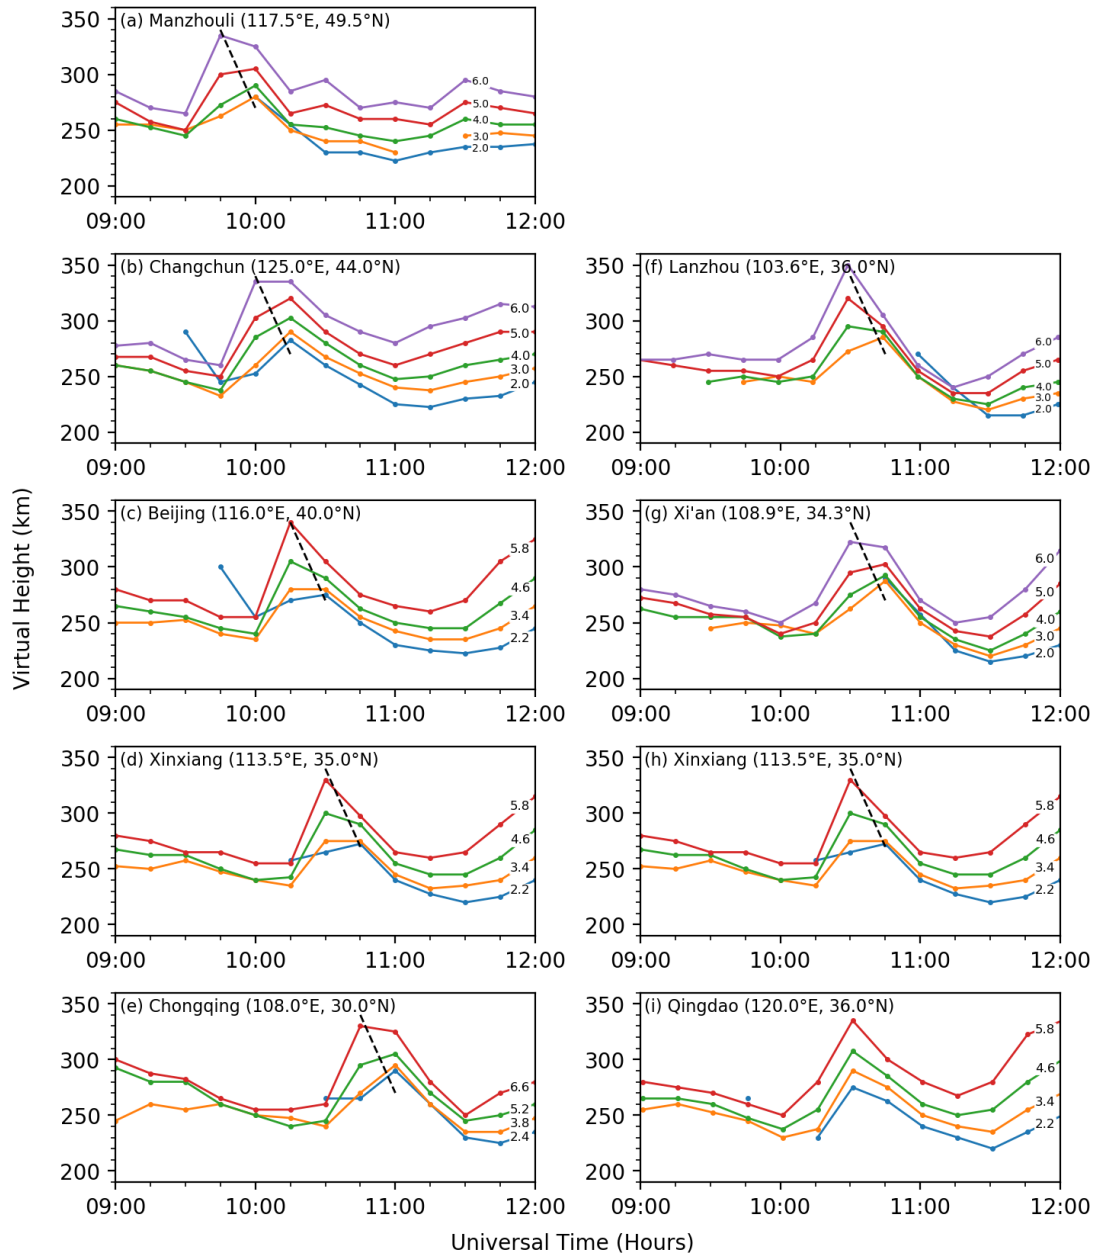

2  
3

1    Figure 7.

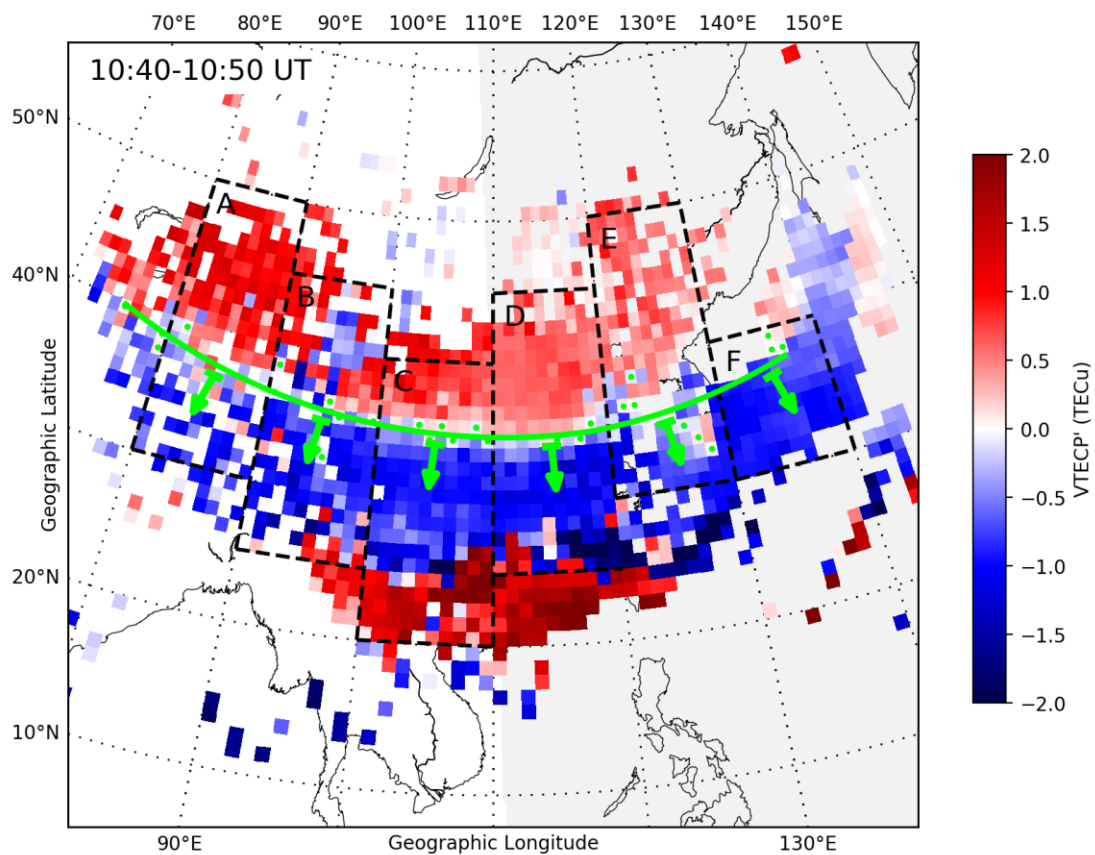

2

3

4

5

1 Figure 8.

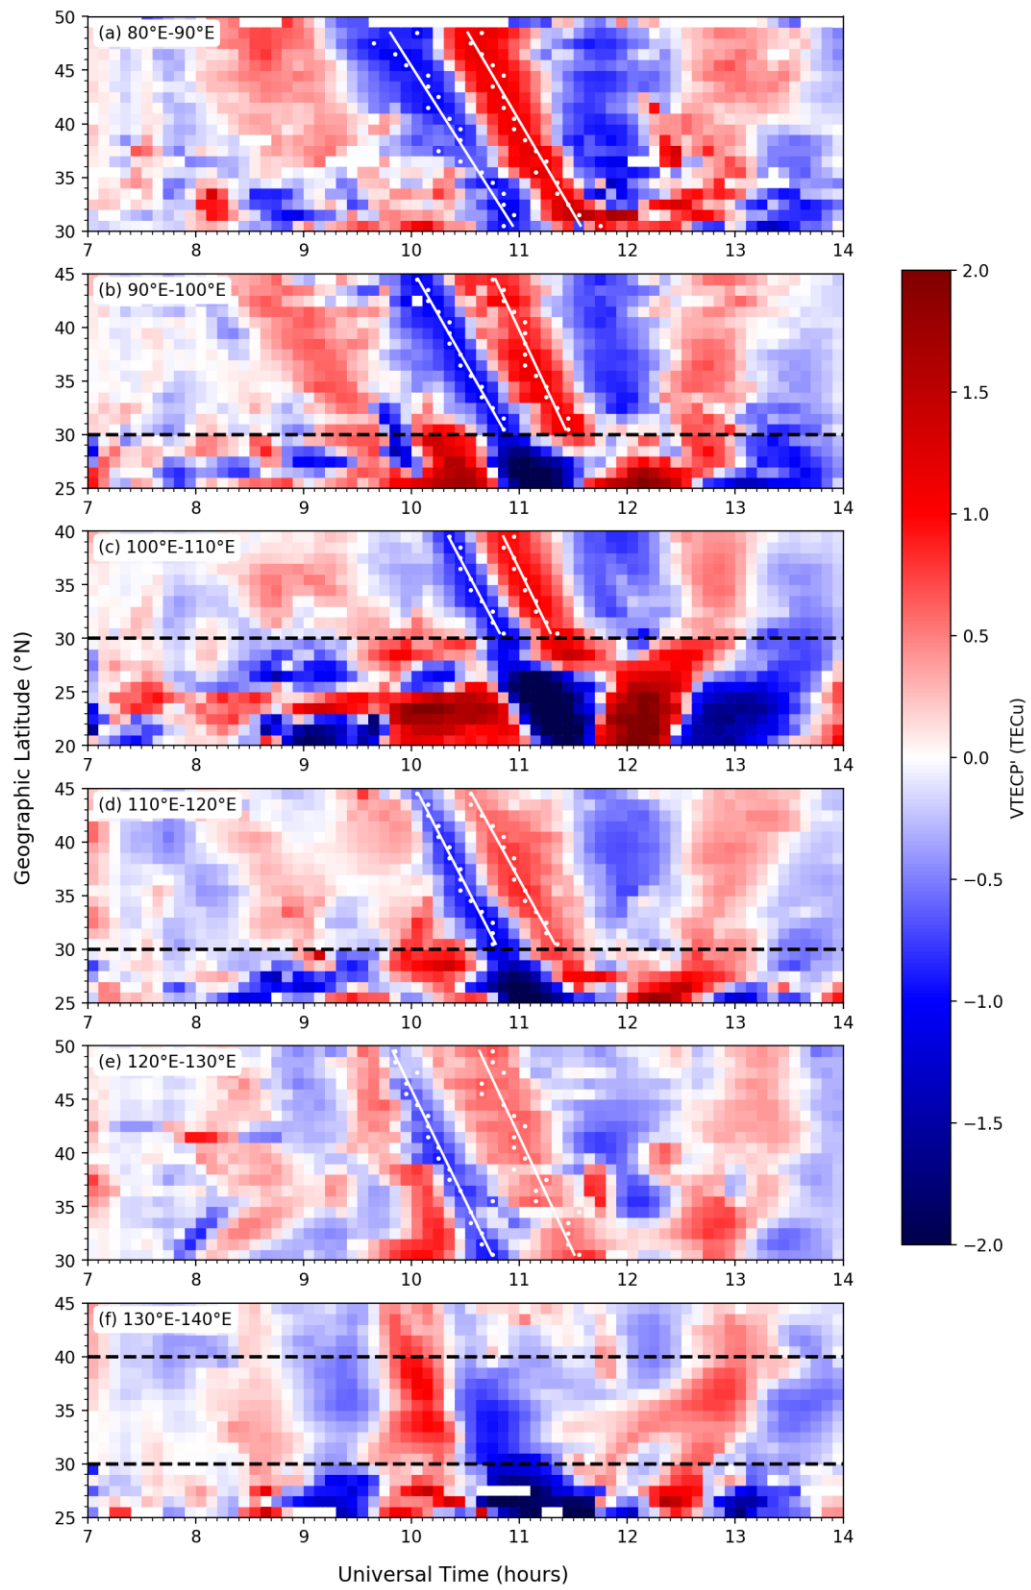

2

3



1 Figure 9.

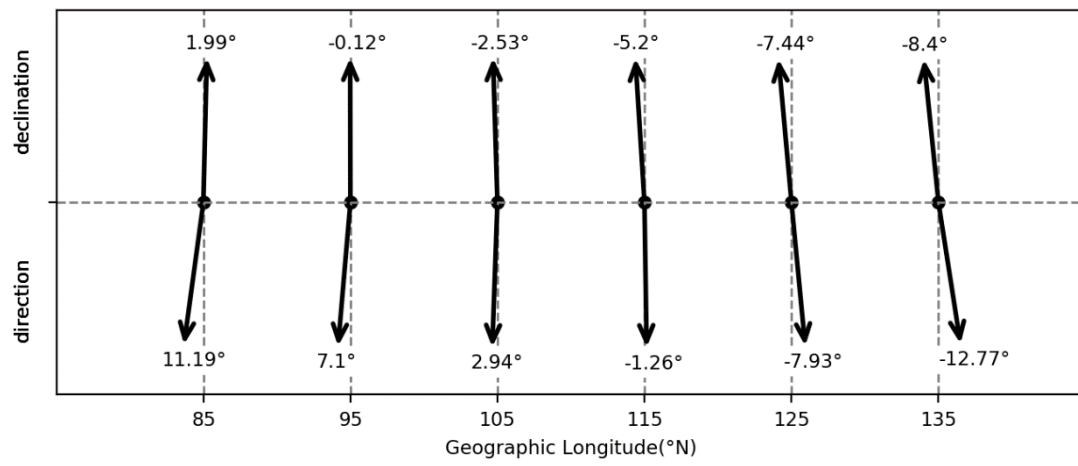

2

3

4

1 Figure 10.

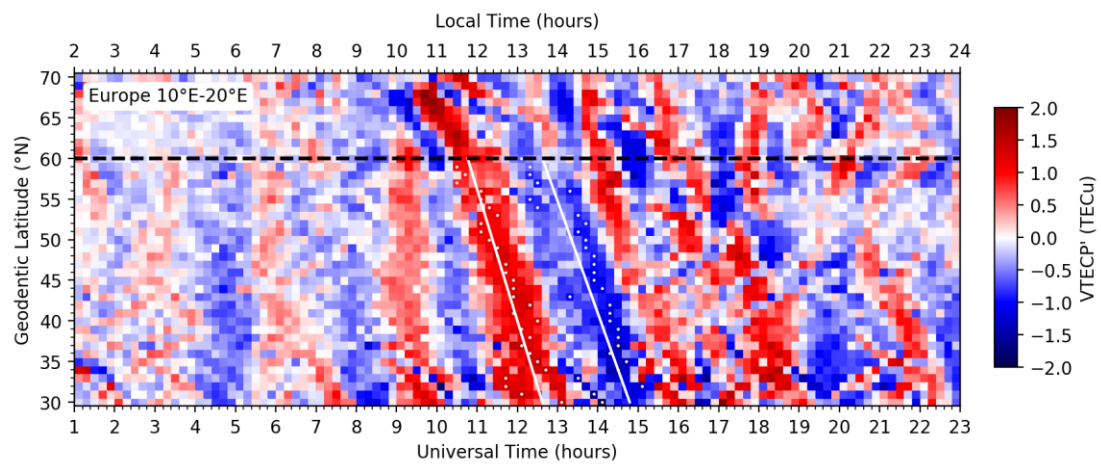

2

3

4
